# Supplementary material for: Senescence-related genes analysis in breast cancer reveals the immune microenvironment and implications for immunotherapy
Source: publisher site journal article supplement (doi:10.18632/aging.205544), 2024-02-14
Supplement: Supplementary file [file aging-v16i4-205544-supplementary-material-SD2.pdf]

## SUPPLEMENTARY TABLE

**Supplementary Table 1. Oligonucleotides used in research.**

| <b>Oligonucleotides</b> | <b>Nucleotide sequence (5'-3')</b>          |
|-------------------------|---------------------------------------------|
| <b>siRNA</b>            |                                             |
| Scramble control        | GCUUCGCGCCGUAGUCUUA                         |
| Si-ACTC1-1              | GGAUUAGCAAGCAAGAGUATTUACUCUUGCUUGCUGAAUCCTT |
| SiACTC1-2               | CUAGCACCAUGAAGAUUAATTUAAAUCUUCAUGGUGCUAGTT  |
| <b>Primer</b>           |                                             |
| GAPDH                   | GGCCTCCAAGGAGTAAGACC (forward)              |
|                         | AGGGGAGATTCAGTGTGGTG (reverse)              |
| ACTC1                   | GTACCCTGGTATTGCTGATCG (forward)             |
|                         | CCTCATCGTACTCTTGCTTGCT (reverse)            |
